# Supplementary material for: The effect of negative pressure aging on the aggregation of Cu2O nanoparticles and its application to laser induced copper electrode fabrication
Source: Royal Society of Chemistry journal article supplement (doi:10.1039/c4cp04769a), 2014-12-19
Supplement: c4cp04769a1.pdf [file c4cp04769a1.pdf]

Supporting Information.

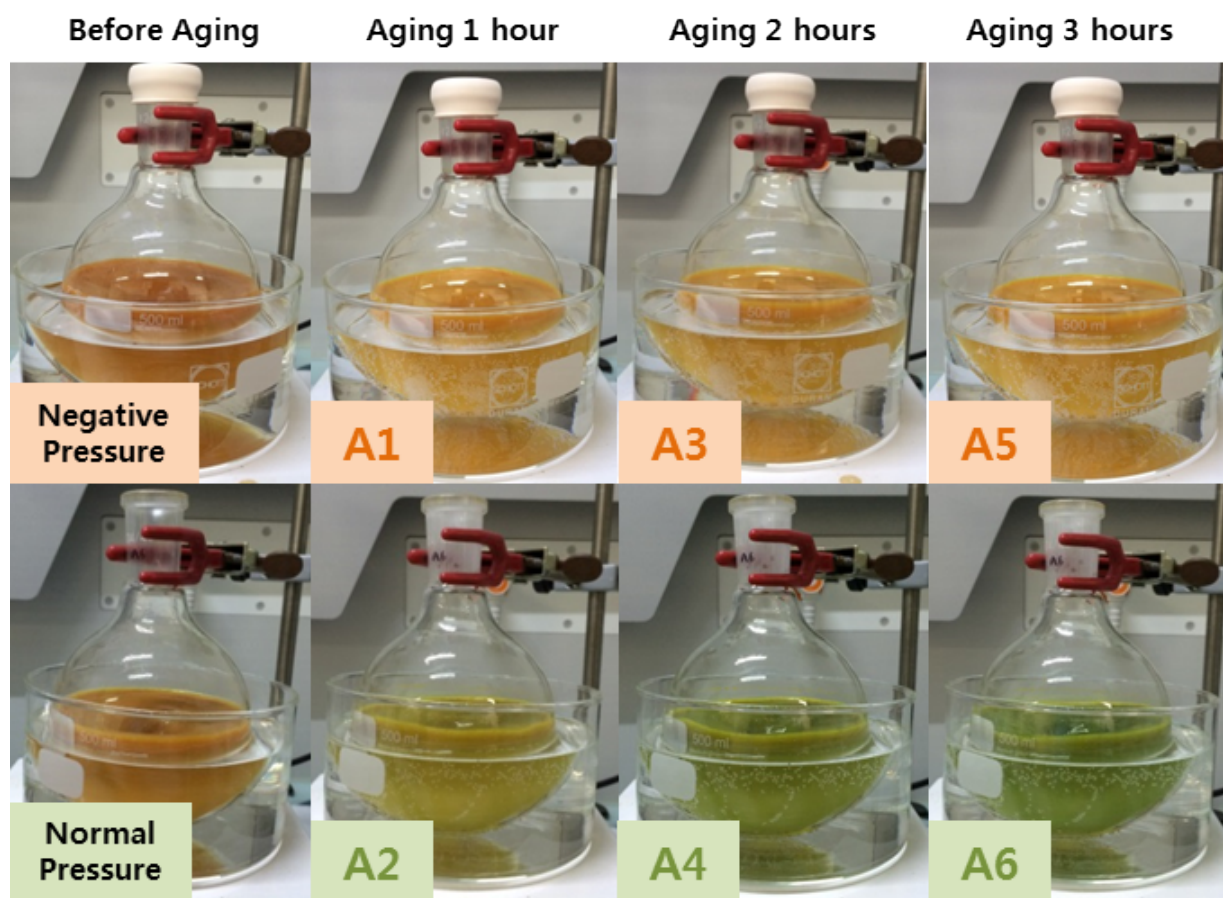

**Fig. S1.** Effect of aging period of negative pressure and normal pressure according to the differences in aging periods. (A1, A2: After 1 hour of aging. A3, A4: After 2 hours of aging. A5, A6: After 3 hours of aging.).

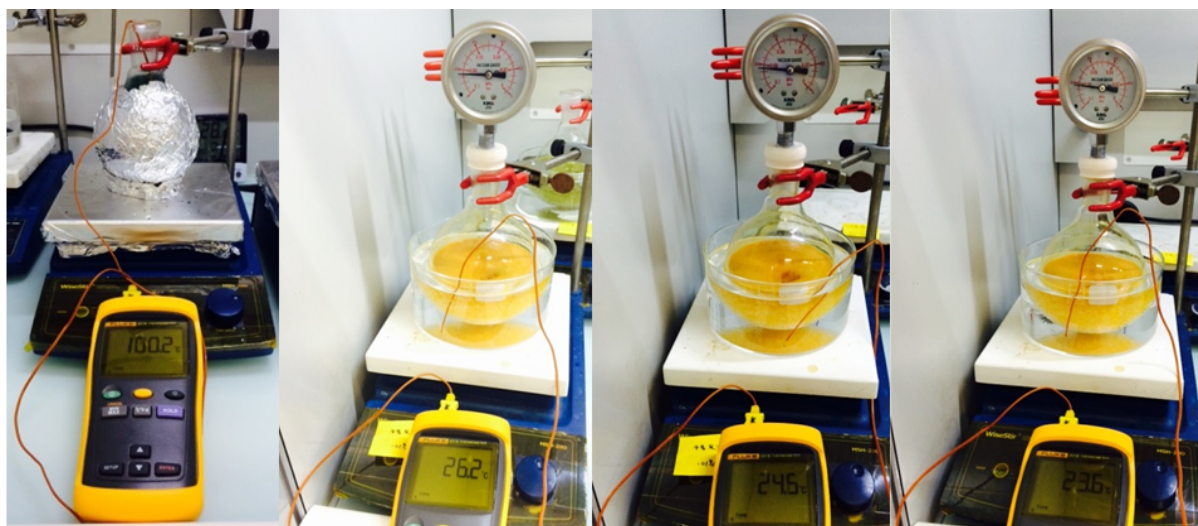

**Fig. S2.** Measurements of temperature and negative pressure during the reaction of copper(I) oxide synthesis using a k-type temperature sensor and a vacuum pressure gauge.

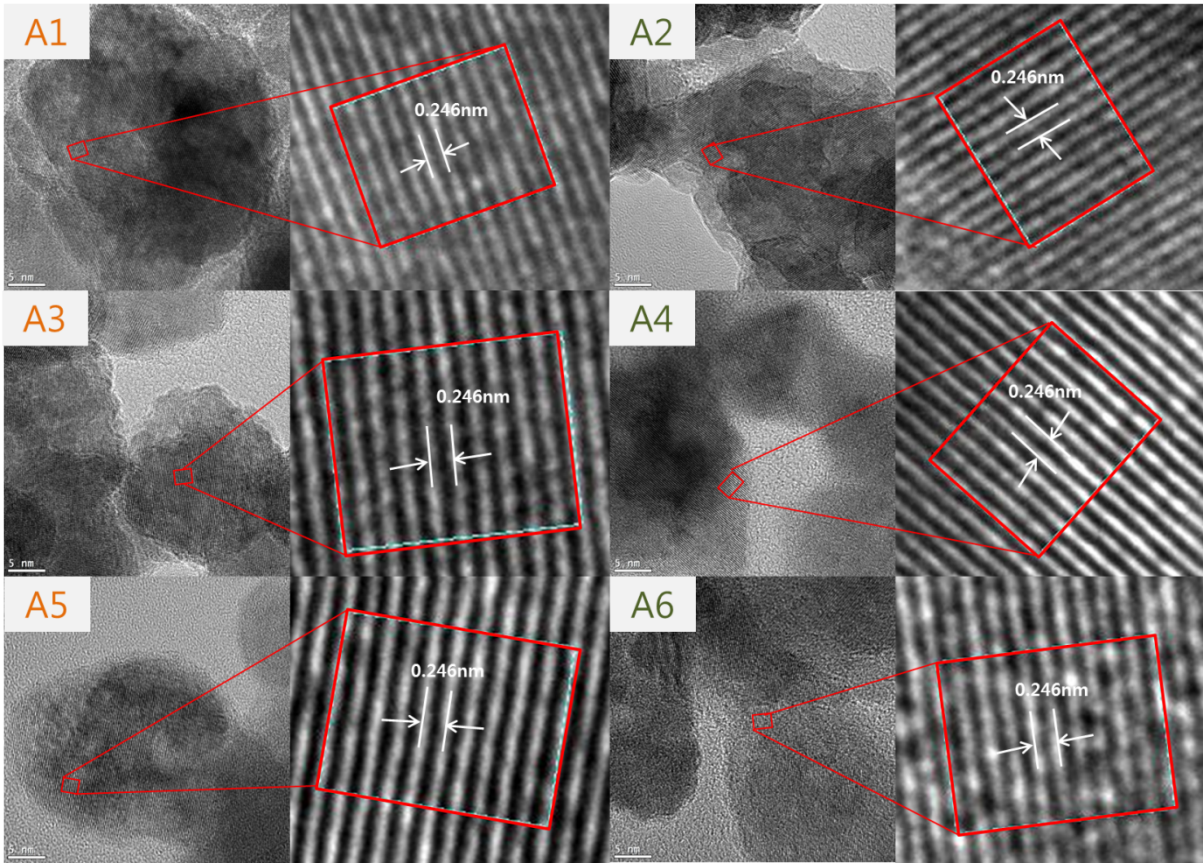

**Fig. S3.** HRTEM image of each of the sample which have d-spacing of (111) of copper oxide.

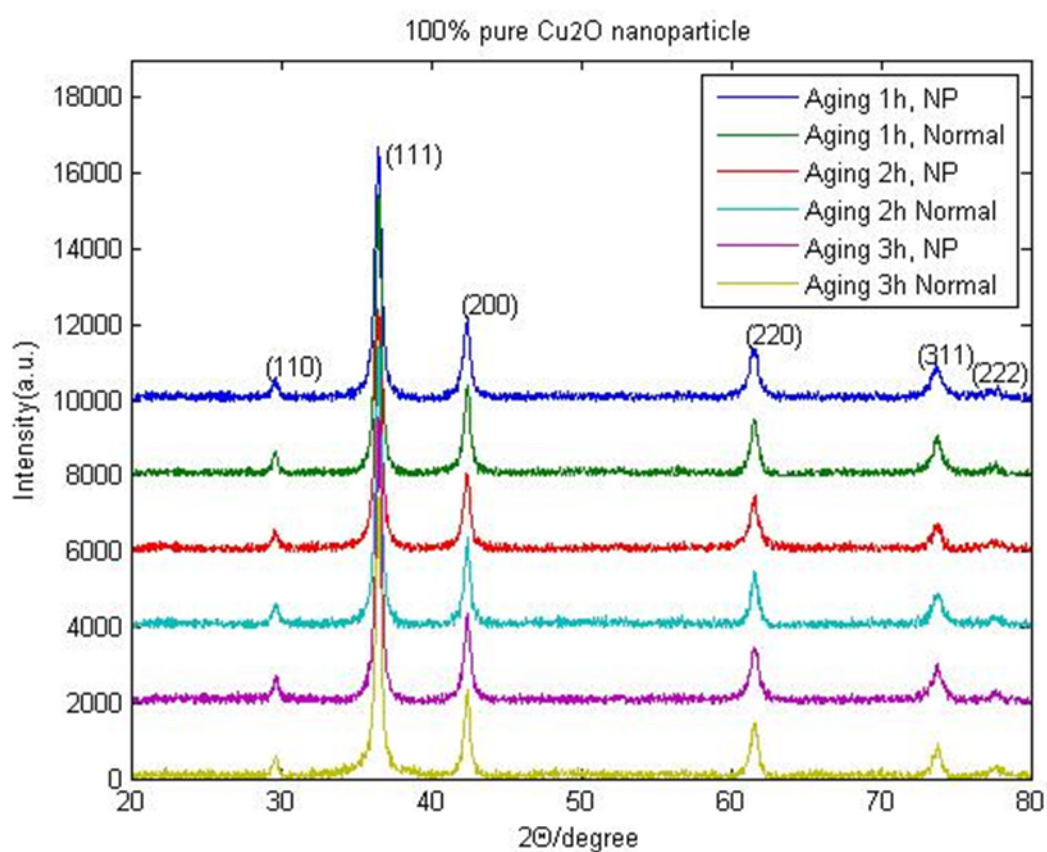

| FWHM( $\theta$ )<br>at the d-spacing of (111) | aging 1h | aging 2h | aging 3h |
|-----------------------------------------------|----------|----------|----------|
| <b>Negative pressure</b>                      | 0.52     | 0.53     | 0.46     |
| <b>Normal pressure</b>                        | 0.45     | 0.46     | 0.45     |

**Fig. S4.** XRD patterns and FWHM( $\theta$ ) of the synthesized copper(I) oxide nanoparticle according to aging period and aging pressure.
